# Supplementary material for: Unexpected high volatile organic compounds emission from vehicles on the Tibetan Plateau
Source: Copernicus journal article supplement (doi:10.5194/egusphere-2025-1835), 2025-05-28
Supplement: Supplementary file 1 [file egusphere-2025-1835-supplement.pdf]

***Supplement of***

**Unexpected high volatile organic compounds emission from  
vehicles on the Tibetan Plateau**

Weichao Huang<sup>1#</sup>, Sihang Wang<sup>2#</sup>, Peng Cheng<sup>1\*</sup>, Bingna Chen<sup>1</sup>, Bin Yuan<sup>2\*</sup>, Pengfei  
Yu<sup>2</sup>, Haichao Wang<sup>3</sup>, Nan Ma<sup>2</sup>, Mei Li<sup>1</sup>, Keding Lu<sup>4,5</sup>

<sup>1</sup>*College of Environment and Climate, Institute of Mass Spectrometry and Atmospheric Environment,  
Guangdong Provincial Engineering Research Center for Online Source Apportionment System of Air  
Pollution, Guangdong-Hongkong-Macau Joint Laboratory of Collaborative Innovation for  
Environmental Quality, Jinan University, Guangzhou 510632, China*

<sup>2</sup>*College of Environment and Climate, Institute for Environmental and Climate Research, Guangdong-  
Hongkong-Macau Joint Laboratory of Collaborative Innovation for Environmental Quality, Jinan  
University, Guangzhou 511443, China*

<sup>3</sup>*School of Atmospheric Sciences, Sun Yat-sen University, Zhuhai 519082, China*

<sup>4</sup>*State Key Joint Laboratory of Environmental Simulation and Pollution Control, College of  
Environmental Sciences and Engineering, Peking University, Beijing, 100871, China*

<sup>5</sup>*International Joint Laboratory of Regional Pollution Control (IJRC), Peking University, Beijing,  
100871, China*

\*Correspondence to: Peng Cheng ([chengp@jnu.edu.cn](mailto:chengp@jnu.edu.cn)); Bin Yuan ([byuan@jnu.edu.cn](mailto:byuan@jnu.edu.cn))

#These authors contributed equally to this work.

**Number of pages: 35**

**Number of Figures: 13**

**Number of Tables: 7**

## Text S1. Instrumentation

Offline analysis of VOCs was conducted using an analytical system (Model TH-300B, Tianhong, Inc., Wuhan, China). This system comprises a pretreatment unit (Model TH-PKU 300B), followed by a gas chromatograph (GC) (Model 7820A, Agilent Technologies) equipped with a flame ionization detector (FID), and an Agilent 5977E quadrupole mass spectrometer detector (MSD) for compound detection and analysis.

The analytical procedure commenced with the filtration of samples, followed by the removal of water and CO<sub>2</sub>, prior to their introduction into the cryotrap at a flow rate of 60 ml/min. Within the cryotrap, the samples were rapidly cooled to a temperature of -150 °C and subsequently heated to 110 °C. This thermal manipulation facilitated the identification of VOCs using FID and MSD in the selected ion monitoring mode. For the quantification of C<sub>2</sub>-C<sub>5</sub> hydrocarbons, the FID utilized a porous layer open tubular phase column. Conversely, the MSD, equipped with a semi-polar DB-624 column, was tasked with detecting C<sub>5</sub>-C<sub>12</sub> hydrocarbons. The DB-624 capillary column's analytical cycle spanned 33 min, beginning with an initial temperature hold at 30 °C for 3 min. This was followed by a temperature ramp to 180 °C at a rate of 6.0 °C/min, which was then maintained for 5 min. The system maintained a carrier gas flow rate of 1.3 mL/min, while the inlet temperature was held constant at 200 °C. At the junction where the GC system interfaces with the MS, the temperature was set at 280 °C. The ion source for the mass spectrometry employed electron ionization (EI) technique.

The analytical system was calibrated with internal and external standards. The target compounds were identified by retention time and mass spectrometry, and quantified by external calibration. MSD signal is the main signal for C<sub>6</sub>-C<sub>12</sub> hydrocarbons, and FID signal is the main signal for C<sub>2</sub>-C<sub>5</sub> hydrocarbons. The internal standard compound standard gas provided by Linde Gas company, USA had a concentration volume fraction of 1.0 ppmv and was diluted to 4.0 ppbv. The calibration standards were prepared by diluting 1.0 ppmv Photochemical Assessment Monitoring Stations (PAMS) standard mixture and TO-15 standard mixture from Linde Gas, USA

to 0.40, 0.80, 1.2, 2.0, 3.2, 4.0 ppbv (Du et al., 2018). The correlation coefficients for the 90 species detected in this study are presented in [Table S1](#).

## **Text S2. Positive Matrix Factorization and Non-Negative Least Squares Analysis**

In this study, we utilized the positive matrix factorization (PMF) 5.0 developed by the US EPA to analyze the sources of VOCs (Paatero and Tapper, 1994). The fundamental principle of the PMF 5.0 model is to decompose the sample component concentration matrix into a source contribution matrix, a source component profile matrix, and a residual matrix. It employs an iterative algorithm to minimize the objective function  $Q$ , thereby determining the optimal analytical result. The computational formula is as shown in [Eq. \(S3\)](#) and [Eq. \(S4\)](#):

$$x_{ij} = \sum_{k=1}^p g_{ik} f_{kj} + e_{ij} \quad (S3)$$

$$Q = \sum_{i=1}^n \sum_{j=1}^m \left[ \frac{x_{ij} - \sum_{k=1}^p g_{ik} f_{kj}}{u_{ij}} \right]^2 \quad (S4)$$

In this equation,  $x_{ij}$  represents the concentration of component  $j$  in sample  $i$ ;  $p$  is the number of pollution sources;  $g_{ik}$  is the contribution of pollution source  $k$  to sample  $i$ ;  $f_{kj}$  is the content of component  $j$  in pollution source  $k$ ;  $e_{ij}$  is the residual;  $Q$  is the cumulative residual; and  $u_{ij}$  is the uncertainty of  $x_{ij}$ .

The PMF 5.0 model requires data on receptor point detection concentration and uncertainty. The uncertainty calculation formula is as shown in [Eq. \(S5\)](#).

$$Unc = \sqrt{(EF \times c)^2 + (0.5 \times MDL)^2} \quad (S5)$$

In this equation,  $EF$  represents the error fraction, is typically set between 5% to 20%. In this study, the  $EF$  value is set at 10%;  $c$  is the detection concentration, in  $\mu\text{g} \cdot \text{m}^{-3}$ ; and  $MDL$  is the method detection limit, in  $\mu\text{g} \cdot \text{m}^{-3}$ .

Table S3 displays the configuration parameters used for the PMF run. Prior to executing the PMF, weights must be assigned to the species involved in the model computations. This study uses the signal-to-noise ratio (S/N) to categorize these species, with categories designated as "Bad" for S/N less than 0.5, "Weak" for S/N between 0.5 and 1.0, and "Strong" for S/N greater than 1.0. Species with relatively low sample concentrations are also designated as "Bad," and those classified as "Bad" are typically excluded from computations. Ultimately, 66 species were included in the PMF model calculations. Considering that the aim of this study is to discern the source contributions of evaporative and exhaust emissions in the tunnel environment via the PMF model, our primary focus is centered on these two emission sources. To accurately reflect the realities of the tunnel environment, we introduced necessary constraints when running the model. These primarily involved certain species associated with non-vehicular sources (Factor 3), ensuring that our model's outcomes align with the actual tunnel conditions.

To further substantiate the results derived from the PMF analysis, we also employed the Non-negative Least Squares (NNLS) regression approach in this study. In the NNLS model, one independent variable signifies the evaporative species n-butane ( $X_1$ ), and another independent variable symbolizes the combustion species ethylene ( $X_2$ ). The dependent variable  $Y$  comprises the remaining species. The computational formula is as shown in Eq. (S6):

$$\begin{aligned} & \text{Min} \sum_i (Y_i - aX_1 - bX_2 - c)^2 \\ & \text{subject to } a > 0, b > 0, \text{ and } c \geq 0 \end{aligned} \quad (\text{S6})$$

In this formulation,  $a$  and  $b$  are the relative contribution coefficients of n-butane and ethylene to  $Y$ , respectively, while  $c$  represents the relative contribution of other sources to  $Y$ . Ensuring that the coefficients remain non-negative aligns with the physical reality that species cannot exert a negative influence on the dependent variable. The objective of the analysis is to find the optimal contribution coefficients that best fit the

observed data, thereby unveiling the relative contribution of each species.

### **Text S3. Clapeyron equation for calculating boiling point**

To calculate the boiling points of n-pentane at high altitudes with lower atmospheric pressures, we employ the Clausius-Clapeyron equation. This equation relates the change in vapor pressure with temperature, allowing us to determine the boiling point at various pressures. The equation is given by:

$$\ln\left(\frac{P_2}{P_1}\right) = \frac{-\Delta H}{R}\left(\frac{1}{T_2} - \frac{1}{T_1}\right) \quad (\text{S7})$$

where,  $P_1$  is the standard atmospheric pressure (101325 Pa).  $T_1$  is the boiling point of the VOC under standard conditions, expressed in K.  $P_2$  is the atmospheric pressure at 4750 m, expressed in 55857 Pa.  $T_2$  is the boiling point of n-pentane at the pressure.  $\Delta H$  is the heat of vaporization of n-pentane, J/mol.  $R$  is the universal gas constant (8.314 J/(mol·K)). For n-pentane, the normal boiling point ( $T_1=308.4$  K) and the heat of vaporization ( $\Delta H=26900$  J/mol) are obtained from the ChemSpider website (2024). As a result, the temperature of n-pentane at an altitude of 4750 m was calculated to be 291.8 K, equivalent to 19°C.

### **Text S4. Special tunnel sample**

In the course of this study, certain unique conditions were encountered that necessitated the exclusion of specific samples from the analysis. Among the 46 samples collected across 10 different high-altitude tunnels, a subset of these samples were influenced by atypical vehicular emission events. Specifically, 5 samples were affected by the passage of heavy-duty diesel vehicles or a surge of traffic near our mobile measurement vehicle at the time of summa canister activation, resulting in anomalously high VOC measurements. Thus, these samples essentially captured a fresh, instantaneous emission of VOCs, rather than VOC concentrations that had been evenly mixed in the tunnel air over time. Additionally, the collection timing of 4 samples may

not have been ideal, as they were gathered during periods of uncharacteristically low CO and CO<sub>2</sub> concentrations in some tunnels. During the specified sampling periods, a discrepancy was observed between the VOC concentrations measured and the corresponding levels of CO and CO<sub>2</sub> recorded by the online instruments. This misalignment led to anomalously high values in the calculated emission factors (EF) and emission ratios (ER). This inconsistency highlights the inherent uncertainties encountered when integrating offline and online data in environmental analysis, particularly in the context of dynamic vehicular emissions. These 9 samples, identified as outliers due to their non-representative nature, were excluded from the EF and ER analysis to maintain data integrity and ensure the reliability of our EF and ER, thereby presenting a more accurate representation of typical vehicular emissions at varying altitudes. The criteria for exclusion were grounded in a comprehensive evaluation of the CO and CO<sub>2</sub> time series data, as well as the specific real-time conditions recorded by the driving recorder during each sampling event ([Fig S13a](#)).

**Table S1.** Detailed information of the test tunnels at high-altitude areas.

| Altitude group/m | Atmospheric Pressure/kPa | Altitude/m | Tunnel                  | Length/m | Type                              | Direction     | Valid samples |
|------------------|--------------------------|------------|-------------------------|----------|-----------------------------------|---------------|---------------|
| 4750             | 55.9                     | 4750       | Mila Mountain Tunnel    | 5727     | Highway two-bore one-way          | West - East   | 3             |
|                  |                          |            |                         |          |                                   | East - West   | 3             |
| 4200             | 60.1                     | 4200       | Yangbajing No. 2 Tunnel | 6275     | Highway two-bore one-way          | West - East   | 3             |
|                  |                          |            |                         |          |                                   | East - West   | 4             |
|                  |                          | 4180       | Songduo Tunnel          | 2195     | Highway two-bore one-way          | East - West   | 1             |
| 3600             | 64.9                     | 3550       | Gala Mountain Tunnel    | 2700     | Highway two-bore one-way          | North - South | 3             |
|                  |                          |            |                         |          |                                   | South - North | 2             |
|                  |                          | 3650       | Bangga Tunnel           | 2000     | Highway two-bore one-way          | West - East   | 4             |
|                  |                          |            |                         |          |                                   | East - West   | 3             |
| 3400             | 66.6                     | 3400       | Gongbujiangda Tunnel    | 1275     | Highway two-bore one-way          | West - East   | 2             |
|                  |                          |            |                         |          |                                   | East - West   | 4             |
|                  |                          | 3300       | Laohuzui Tunnel         | 461      | Rural road single-bore two-way    | North - South | 1             |
|                  |                          |            |                         |          |                                   | South - North | 1             |
| 3000             | 70.1                     | 2980       | Bayi Tunnel             | 650      | Highway two-bore one-way          | West - East   | 2             |
|                  |                          |            |                         | 575      |                                   | East - West   | 3             |
| 2000             | 79.5                     | 2040       | Parlung No. 1 Tunnel    | 1390     | National road single-bore two-way | West - East   | 1             |
|                  |                          |            |                         |          |                                   | East - West   | 2             |
|                  |                          | 2020       | Parlung No. 2 Tunnel    | 2087     | National road single-bore two-way | West - East   | 2             |
|                  |                          |            |                         |          |                                   | East - West   | 2             |

**Table S2.** The correlation of VOC species detected by the GC-FID/MS.

| VOC species            | MDL (ppb) | RE (%) | R <sup>2</sup> |
|------------------------|-----------|--------|----------------|
| Ethane                 | 0.050     | 0.07   | 1.0000         |
| Propane                | 0.021     | 0.02   | 1.0000         |
| n-Butane               | 0.030     | 1.08   | 0.9999         |
| i-Butane               | 0.012     | 1.17   | 0.9997         |
| n-Pentane              | 0.026     | -16.60 | 0.9967         |
| i-Pentane              | 0.012     | -10.83 | 0.9984         |
| Cyclopentane           | 0.026     | -16.36 | 0.9984         |
| 2,2-Dimethylbutane     | 0.007     | -12.36 | 0.9982         |
| 2,3-Dimethylbutane     | 0.005     | -7.11  | 0.9967         |
| 2-Methylpentane        | 0.005     | -12.37 | 0.9988         |
| 3-Methylpentane        | 0.007     | -14.10 | 0.9983         |
| Cyclohexane            | 0.004     | -12.89 | 0.9985         |
| Methylcyclopentane     | 0.008     | -13.52 | 0.9981         |
| n-Hexane               | 0.016     | -12.64 | 0.9984         |
| 2,3-Dimethylpentane    | 0.016     | -13.63 | 0.9983         |
| 2,4-Dimethylpentane    | 0.005     | -13.61 | 0.9981         |
| 2-Methylhexane         | 0.008     | -13.69 | 0.9979         |
| 3-Methylhexane         | 0.006     | -13.28 | 0.9982         |
| Methylcyclohexane      | 0.008     | -14.16 | 0.9983         |
| n-Heptane              | 0.007     | -13.70 | 0.9980         |
| 2,2,4-Trimethylpentane | 0.003     | -13.24 | 0.9984         |
| 2,3,4-Trimethylpentane | 0.008     | -14.14 | 0.9983         |
| 2-Methylheptane        | 0.008     | -14.75 | 0.9987         |
| 3-Methylheptane        | 0.009     | -14.47 | 0.9983         |
| n-Octane               | 0.121     | -15.55 | 0.9985         |
| n-Nonane               | 0.021     | -19.35 | 0.9983         |
| n-Decane               | 0.030     | -35.78 | 0.9962         |



|                        |       |        |        |
|------------------------|-------|--------|--------|
| n-Undecane             | 0.020 | -50.45 | 0.9804 |
| n-Dodecane             | 0.020 | -50.63 | 0.9797 |
| Ethylene               | 0.030 | 0.06   | 1.0000 |
| Propene                | 0.025 | 0.60   | 1.0000 |
| 1,3-Butadiene          | 0.030 | -10.79 | 0.9961 |
| 1-Butene               | 0.030 | -13.35 | 0.9979 |
| cis-2-Butene           | 0.023 | -9.67  | 0.9984 |
| trans-2-Butene         | 0.031 | -20.39 | 0.9991 |
| 1-Pentene              | 0.009 | -13.42 | 0.9980 |
| Isoprene               | 0.015 | -13.72 | 0.9987 |
| cis-2-Pentene          | 0.008 | -12.90 | 0.9987 |
| trans-2-Pentene        | 0.008 | -13.35 | 0.9979 |
| 1-Hexene               | 0.011 | -14.05 | 0.9984 |
| Acetylene              | 0.048 | 4.82   | 1.0000 |
| Benzene                | 0.007 | -13.38 | 0.9980 |
| Toluene                | 0.005 | -14.76 | 0.9984 |
| Ethylbenzene           | 0.003 | -17.48 | 0.9985 |
| Styrene                | 0.013 | -21.72 | 0.9982 |
| o-Xylene               | 0.003 | -19.83 | 0.9985 |
| m/p-Xylene             | 0.004 | 15.37  | 0.9986 |
| 1,2,3-Trimethylbenzene | 0.002 | -42.71 | 0.9955 |
| 1,2,4-Trimethylbenzene | 0.003 | -40.18 | 0.9970 |
| 1,3,5-Trimethylbenzene | 0.004 | -36.96 | 0.9981 |
| n-Propylbenzene        | 0.016 | -32.10 | 0.9983 |
| i-Propylbenzene        | 0.020 | -26.42 | 0.9984 |
| o-Ethyltoluene         | 0.020 | -36.06 | 0.9980 |
| m-Ethyltoluene         | 0.020 | -34.17 | 0.9984 |
| p-Ethyltoluene         | 0.020 | -36.96 | 0.9981 |
| Bromomethane           | 0.004 | -8.86  | 0.9963 |

|                            |       |        |        |
|----------------------------|-------|--------|--------|
| Chloroform                 | 0.002 | -13.43 | 0.9986 |
| Chloromethane              | 0.020 | -7.61  | 0.9955 |
| Dibromochloromethane       | 0.030 | -16.05 | 0.9988 |
| Dichloromethane            | 0.038 | -10.50 | 0.9998 |
| Tribromomethane            | 0.004 | -19.34 | 0.9983 |
| Freon-11                   | 0.016 | -4.88  | 0.9970 |
| 1,1,2,2-tetrachloroethane  | 0.008 | -34.65 | 0.9964 |
| Freon-114                  | 0.130 | -13.01 | 0.9927 |
| 1,1,2-Trichloroethane      | 0.011 | -16.72 | 0.9978 |
| 1,1-Dichloroethane         | 0.010 | -13.25 | 0.9982 |
| 1,1-Dichloroethylene       | 0.010 | -11.73 | 0.9988 |
| Freon-113                  | 0.011 | -91.22 | 0.9990 |
| 1,2-Dibromoethane          | 0.010 | -17.20 | 0.9977 |
| 1,2-Dichloroethane         | 0.019 | -13.84 | 0.9993 |
| Chloroethane               | 0.023 | -12.08 | 0.9966 |
| Tetrachloroethylene        | 0.008 | -16.21 | 0.9980 |
| Trichloroethylene          | 0.002 | -13.79 | 0.9977 |
| Vinyl chloride             | 0.010 | -12.52 | 0.9945 |
| cis-1,2-Dichloroethylene   | 0.015 | -16.50 | 0.9968 |
| trans-1,2-Dichloroethylene | 0.015 | -12.39 | 0.9988 |
| 1,2-Dichloropropane        | 0.013 | -14.61 | 0.9978 |
| trans-1,3-Dichloropropene  | 0.012 | -18.14 | 0.9985 |
| Chlorobenzene              | 0.008 | -15.85 | 0.9982 |
| o-Dichlorobenzene          | 0.006 | -34.47 | 0.9971 |
| m-Dichlorobenzene          | 0.006 | -28.59 | 0.9980 |
| p-Dichlorobenzene          | 0.004 | -27.33 | 0.9978 |
| Ethanol                    | 0.131 | -23.68 | 0.9937 |
| Acetone                    | 0.011 | -36.23 | 0.9890 |
| Acrolein                   | 0.022 | -12.84 | 0.9987 |

|                             |       |        |        |
|-----------------------------|-------|--------|--------|
| 2-Butanone                  | 0.014 | -13.89 | 0.9982 |
| Tetrahydrofuran             | 0.005 | -12.84 | 0.9987 |
| Vinyl acetate               | 0.021 | -13.63 | 0.9981 |
| Methyl isobutyl ketone      | 0.004 | -14.31 | 0.9984 |
| Methyl tertiary-butyl ether | 0.025 | -49.89 | 0.9895 |

159

160

161

**Table S3.** Configurations of the PMF model runs.

| Parameter/ PMF run                                          | Source of tunnel VOCs                                                                                                                                                                                                                                                                                                                                                                                                                                                                                                                                        |
|-------------------------------------------------------------|--------------------------------------------------------------------------------------------------------------------------------------------------------------------------------------------------------------------------------------------------------------------------------------------------------------------------------------------------------------------------------------------------------------------------------------------------------------------------------------------------------------------------------------------------------------|
| N species                                                   | 66                                                                                                                                                                                                                                                                                                                                                                                                                                                                                                                                                           |
| N samples                                                   | 46                                                                                                                                                                                                                                                                                                                                                                                                                                                                                                                                                           |
| N factors                                                   | 3                                                                                                                                                                                                                                                                                                                                                                                                                                                                                                                                                            |
| Number of runs                                              | 5                                                                                                                                                                                                                                                                                                                                                                                                                                                                                                                                                            |
| Uncertainty                                                 | 10%                                                                                                                                                                                                                                                                                                                                                                                                                                                                                                                                                          |
| Treatment of data below<br>minimum detection limit<br>(MDL) | No treatment                                                                                                                                                                                                                                                                                                                                                                                                                                                                                                                                                 |
| Seed Value                                                  | Random                                                                                                                                                                                                                                                                                                                                                                                                                                                                                                                                                       |
| Category                                                    | Bad: Styrene, Bromomethane, Dibromochloromethane, Tribromomethane, Freon-11, 1,1,2,2-tetrachloroethane, Freon-114, 1,1-Dichloroethane, 1,1-Dichloroethylene, Freon-113, 1,2-Dibromoethane, 1,2-Dichloroethane, Chloroethane, Tetrachloroethylene, Trichloroethylene, Vinyl chloride, cis-1,2-Dichloroethylene, trans-1,2-Dichloroethylene, trans-1,3-Dichloropropene, Chlorobenzene, o-Dichlorobenzene, m-Dichlorobenzene, Vinyl acetate, Methyl isobutyl ketone<br>Factor 1 (Evaporative emission) Pull Down Maximally (5 % dQ): Benzene, Toluene, Isoprene |
| Constraints                                                 | Factor 3 (Non-vehicular sources) Pull Down Maximally (5 % dQ): n-Butane, i-Butane, n-Pentane, i-Pentane, n-Octane, n-Nonane, n-Decane, n-Undecane, n-Dodecane, Ethylene, Propene, Toluene, Acetylene                                                                                                                                                                                                                                                                                                                                                         |

162

163 **Table S4.** The  $\theta$  angles (°) among the source profiles at different altitudes in this study.

| VOC sources | 4750 m | 4200 m | 3600 m | 3400 m | 3000 m | 2000 m |
|-------------|--------|--------|--------|--------|--------|--------|
| 4750 m      | 0      | 19     | 21     | 18     | 49     | 21     |
| 4200 m      |        | 0      | 12     | 18     | 41     | 29     |
| 3600 m      |        |        | 0      | 19     | 42     | 31     |
| 3400 m      |        |        |        | 0      | 40     | 22     |
| 3000 m      |        |        |        |        | 0      | 50     |
| 2000 m      |        |        |        |        |        | 0      |

164

165

**Table S5.** The  $\theta$  angles ( $^{\circ}$ ) among the different source profiles in previous studies.

| The $\theta$ angles ( $^{\circ}$ )    | Gasoline vapors <sup>a</sup> | Gasoline vehicle exhaust <sup>b</sup> | Low altitude tunnel <sup>c</sup> |
|---------------------------------------|------------------------------|---------------------------------------|----------------------------------|
| Gasoline vapors <sup>a</sup>          | 0                            | 50                                    | 41                               |
| Gasoline vehicle exhaust <sup>b</sup> |                              | 0                                     | 18                               |
| Low altitude tunnel <sup>c</sup>      |                              |                                       | 0                                |

<sup>a</sup>Average profiles of gasoline vapors derived from SHED tests (Harley et al., 2000; Na et al., 2004; Liu et al., 2008; Zhang et al., 2013; Wu et al., 2015; Man et al., 2020; Sun et al., 2021)

<sup>b</sup>Average profiles of gasoline vehicle exhaust derived from dynamometer tests (Schauer et al., 2002; Na et al., 2004; Guo et al., 2011; Gao et al., 2012; Ou et al., 2014; Li et al., 2019; Wang et al., 2022)

<sup>c</sup>Average profiles of vehicular emissions derived from low-altitude tunnel measurements (Staehelin et al., 1998; Hwa et al., 2002; Zhang et al., 2018b; Chiang et al., 2007; Gentner et al., 2013; Zhang et al., 2018a; Sun et al., 2019; Feng et al., 2021; Song et al., 2020; Jin et al., 2021; Song et al., 2018)

177 **Table S6.** The relative contribution (%) of each species in the PMF source apportionment and NNLS regression results.

| Species                | PMF Evaporative emissions | PMF Tailpipe exhaust | PMF Non-vehicular sources | NNLS Evaporative emissions | NNLS Tailpipe exhaust | NNLS Non-vehicular sources |
|------------------------|---------------------------|----------------------|---------------------------|----------------------------|-----------------------|----------------------------|
| Ethane                 | 0                         | 92                   | 7.6                       | 0                          | 95                    | 5.1                        |
| Propane                | 27                        | 31                   | 42                        | 4.4                        | 78                    | 17                         |
| n-Butane               | 88                        | 11                   | 0.8                       | 100                        | 0                     | 0                          |
| i-Butane               | 86                        | 10                   | 4.4                       | 52                         | 48                    | 0                          |
| n-Pentane              | 87                        | 12                   | 1.6                       | 71                         | 29                    | 0                          |
| i-Pentane              | 88                        | 10                   | 1.4                       | 64                         | 36                    | 0                          |
| Cyclopentane           | 81                        | 11                   | 8.3                       | 90                         | 10                    | 0                          |
| 2,2-Dimethylbutane     | 72                        | 27                   | 1.2                       | 97                         | 2.7                   | 0                          |
| 2,3-Dimethylbutane     | 86                        | 14                   | 0                         | 100                        | 0                     | 0                          |
| 2-Methylpentane        | 86                        | 14                   | 0                         | 100                        | 0                     | 0                          |
| 3-Methylpentane        | 86                        | 14                   | 0                         | 100                        | 0                     | 0                          |
| Cyclohexane            | 79                        | 18                   | 3.1                       | 35                         | 65                    | 0                          |
| Methylcyclopentane     | 83                        | 16                   | 1.0                       | 100                        | 0                     | 0                          |
| n-Hexane               | 79                        | 14                   | 6.6                       | 45                         | 55                    | 0                          |
| 2,3-Dimethylpentane    | 77                        | 22                   | 1.4                       | 83                         | 17                    | 0                          |
| 2,4-Dimethylpentane    | 72                        | 22                   | 5.3                       | 35                         | 65                    | 0                          |
| 2-Methylhexane         | 78                        | 21                   | 1.1                       | 96                         | 4.5                   | 0                          |
| 3-Methylhexane         | 76                        | 22                   | 1.6                       | 77                         | 23                    | 0                          |
| Methylcyclohexane      | 63                        | 31                   | 5.9                       | 100                        | 0                     | 0                          |
| n-Heptane              | 71                        | 27                   | 2.2                       | 62                         | 38                    | 0                          |
| 2,2,4-Trimethylpentane | 75                        | 25                   | 0                         | 100                        | 0                     | 0                          |

|                        |     |     |     |     |     |     |
|------------------------|-----|-----|-----|-----|-----|-----|
| 2,3,4-Trimethylpentane | 54  | 46  | 0   | 99  | 1.5 | 0   |
| 2-Methylheptane        | 60  | 38  | 2.0 | 56  | 44  | 0   |
| 3-Methylheptane        | 59  | 39  | 2.4 | 59  | 41  | 0   |
| n-Octane               | 56  | 44  | 0   | 100 | 0   | 0   |
| n-Nonane               | 31  | 69  | 0   | 12  | 88  | 0   |
| n-Decane               | 7.5 | 92  | 0   | 2.2 | 98  | 0   |
| n-Undecane             | 4.2 | 96  | 0   | 1.2 | 99  | 0   |
| n-Dodecane             | 5.4 | 95  | 0   | 1.1 | 99  | 0   |
| Ethylene               | 0   | 100 | 0   | 0.0 | 100 | 0   |
| Propene                | 5.3 | 95  | 0   | 0.5 | 99  | 0   |
| 1,3-Butadiene          | 74  | 26  | 0   | 50  | 50  | 0   |
| 1-Butene               | 86  | 14  | 0   | 55  | 45  | 0   |
| cis-2-Butene           | 89  | 10  | 0   | 100 | 0   | 0   |
| trans-2-Butene         | 89  | 11  | 0   | 77  | 23  | 0   |
| 1-Pentene              | 88  | 12  | 0   | 68  | 32  | 0   |
| Isoprene               | 0   | 64  | 36  | 8.9 | 57  | 35  |
| cis-2-Pentene          | 89  | 11  | 0   | 100 | 0   | 0   |
| trans-2-Pentene        | 90  | 10  | 0   | 100 | 0   | 0   |
| 1-Hexene               | 84  | 16  | 0.6 | 44  | 56  | 0   |
| Acetylene              | 6.2 | 94  | 0   | 11  | 89  | 0   |
| Benzene                | 6.2 | 93  | 1.1 | 11  | 88  | 1.1 |
| Toluene                | 0   | 77  | 23  | 13  | 78  | 8.7 |
| Ethylbenzene           | 26  | 56  | 19  | 25  | 48  | 27  |
| o-Xylene               | 26  | 61  | 13  | 23  | 58  | 19  |
| m/p-Xylene             | 30  | 58  | 12  | 26  | 57  | 17  |
| 1,2,3-Trimethylbenzene | 14  | 84  | 2.4 | 12  | 80  | 8.2 |



|                             |     |    |     |     |    |     |
|-----------------------------|-----|----|-----|-----|----|-----|
| 1,2,4-Trimethylbenzene      | 18  | 81 | 1.1 | 17  | 76 | 6.6 |
| 1,3,5-Trimethylbenzene      | 21  | 77 | 1.9 | 21  | 74 | 5.4 |
| n-Propylbenzene             | 27  | 68 | 5.5 | 22  | 71 | 7.1 |
| i-Propylbenzene             | 22  | 54 | 24  | 28  | 41 | 32  |
| o-Ethyltoluene              | 21  | 75 | 3.9 | 19  | 74 | 6.9 |
| m-Ethyltoluene              | 21  | 79 | 0   | 21  | 76 | 3.2 |
| p-Ethyltoluene              | 25  | 74 | 0.6 | 26  | 71 | 3.3 |
| Chloroform                  | 27  | 16 | 57  | 5.8 | 87 | 7.4 |
| Chloromethane               | 24  | 47 | 29  | 26  | 74 | 0   |
| Dichloromethane             | 6.6 | 12 | 81  | 2.7 | 89 | 8.1 |
| 1,1,2-Trichloroethane       | 46  | 48 | 5.4 | 2.3 | 98 | 0   |
| 1,2-Dichloropropane         | 0   | 35 | 65  | 2.5 | 77 | 20  |
| p-Dichlorobenzene           | 7.6 | 38 | 54  | 8.0 | 50 | 42  |
| Ethanol                     | 13  | 14 | 73  | 34  | 44 | 22  |
| Acetone                     | 16  | 36 | 48  | 8.3 | 82 | 10  |
| Acrolein                    | 64  | 33 | 3.6 | 72  | 22 | 6.8 |
| 2-Butanone                  | 11  | 24 | 65  | 38  | 56 | 5.9 |
| Tetrahydrofuran             | 75  | 21 | 4.1 | 52  | 41 | 7.1 |
| Methyl tertiary-butyl ether | 89  | 11 | 0   | 100 | 0  | 0   |

**Table S7.** The contribution proportion (%) of all tunnels and various altitude in the PMF source apportionment results.

| Altitude (m) | Evaporative<br>emissions | Tailpipe exhaust | Non-vehicular<br>sources |
|--------------|--------------------------|------------------|--------------------------|
| 2000         | 51                       | 36               | 13                       |
| 3000         | 42                       | 33               | 25                       |
| 3400         | 53                       | 28               | 19                       |
| 3600         | 77                       | 16               | 8                        |
| 4200         | 67                       | 25               | 8                        |
| 4750         | 72                       | 19               | 9                        |
| All tunnels  | 67                       | 24               | 9                        |

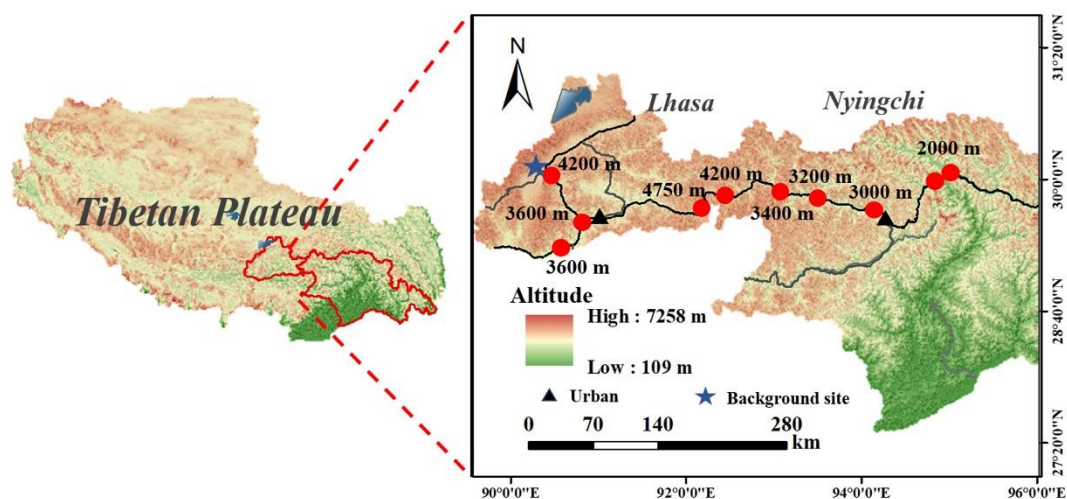

**Figure S1.** Map distribution of tunnels at different altitudes in this study.

185

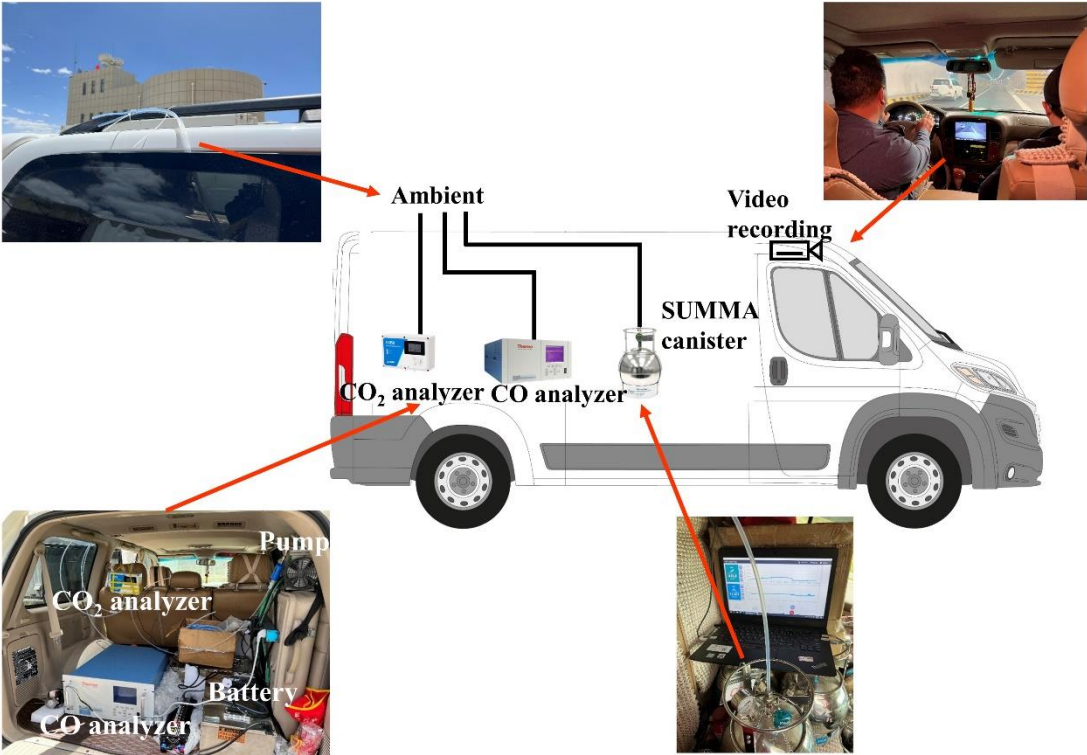

186

187 **Figure S2.** Mobile measurement system design diagram.

188

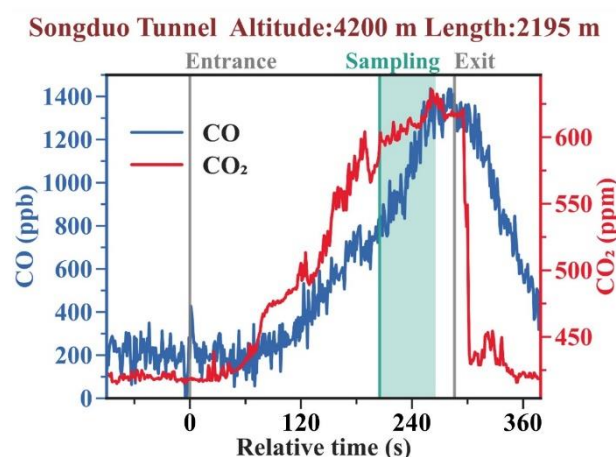

**Figure S3.** The time series plots of CO and CO<sub>2</sub> concentrations in representative tunnels. The two solid gray lines represent the entrance and exit of the tunnel. The green solid line and shaded area indicate the sampling time when the summa canister was opened. The shaded region represents a 1-min sampling duration of the canister. The time axis has been normalized, with the time of entering the tunnel set as 0 s.

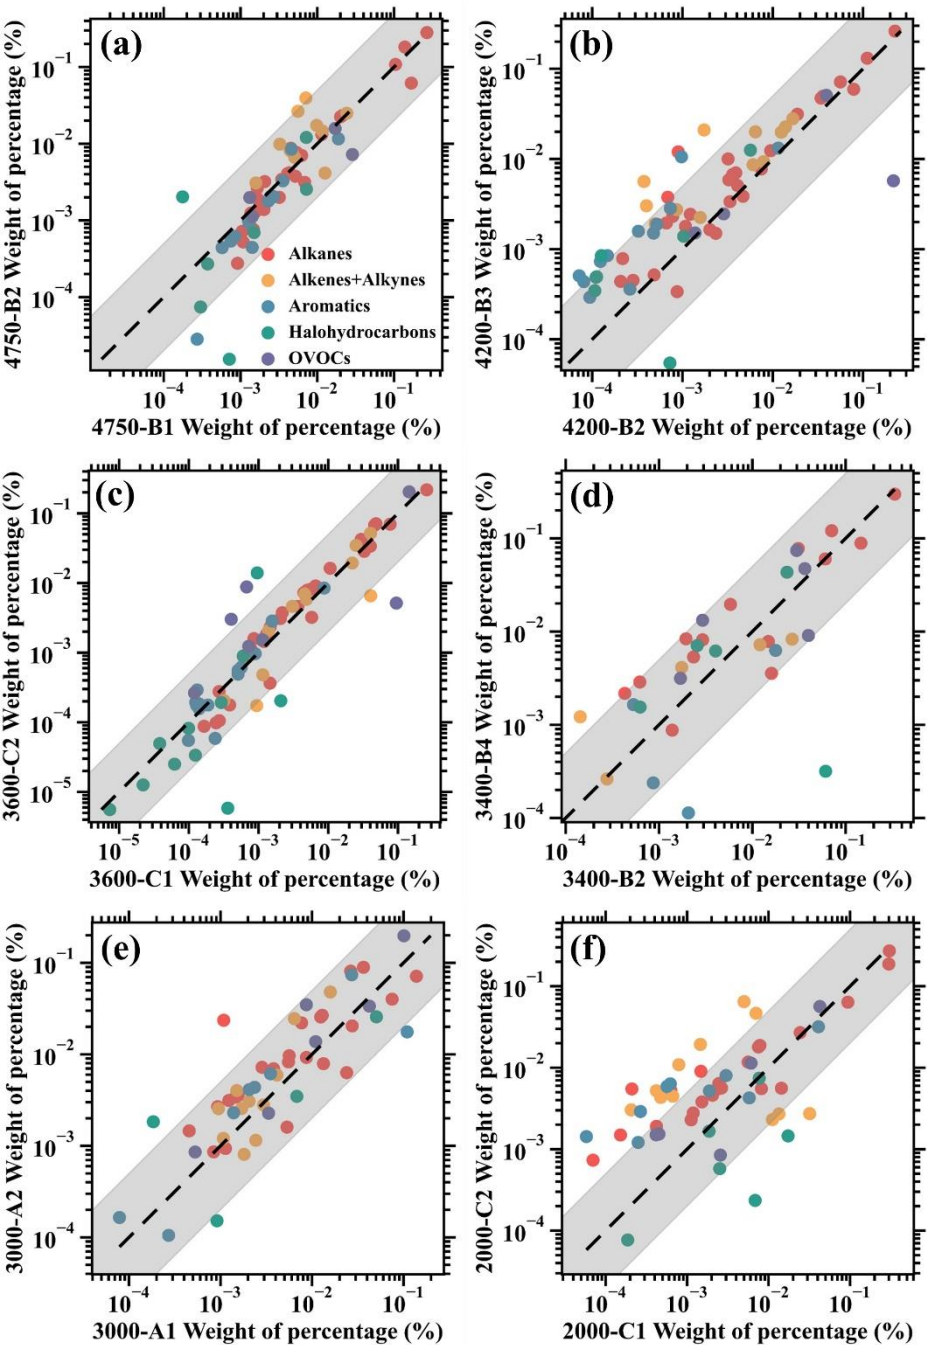

197

198 **Figure S4.** Source profile consistency in the same direction across various altitudes in  
199 a tunnel. This figure delineates the source profile fitting results for samples collected in  
200 the same direction in a specific tunnel, at different altitudes, (a) through (f) correspond  
201 sequentially to the fitted source profiles at each altitude, from 4750 m to 2000 m.  
202

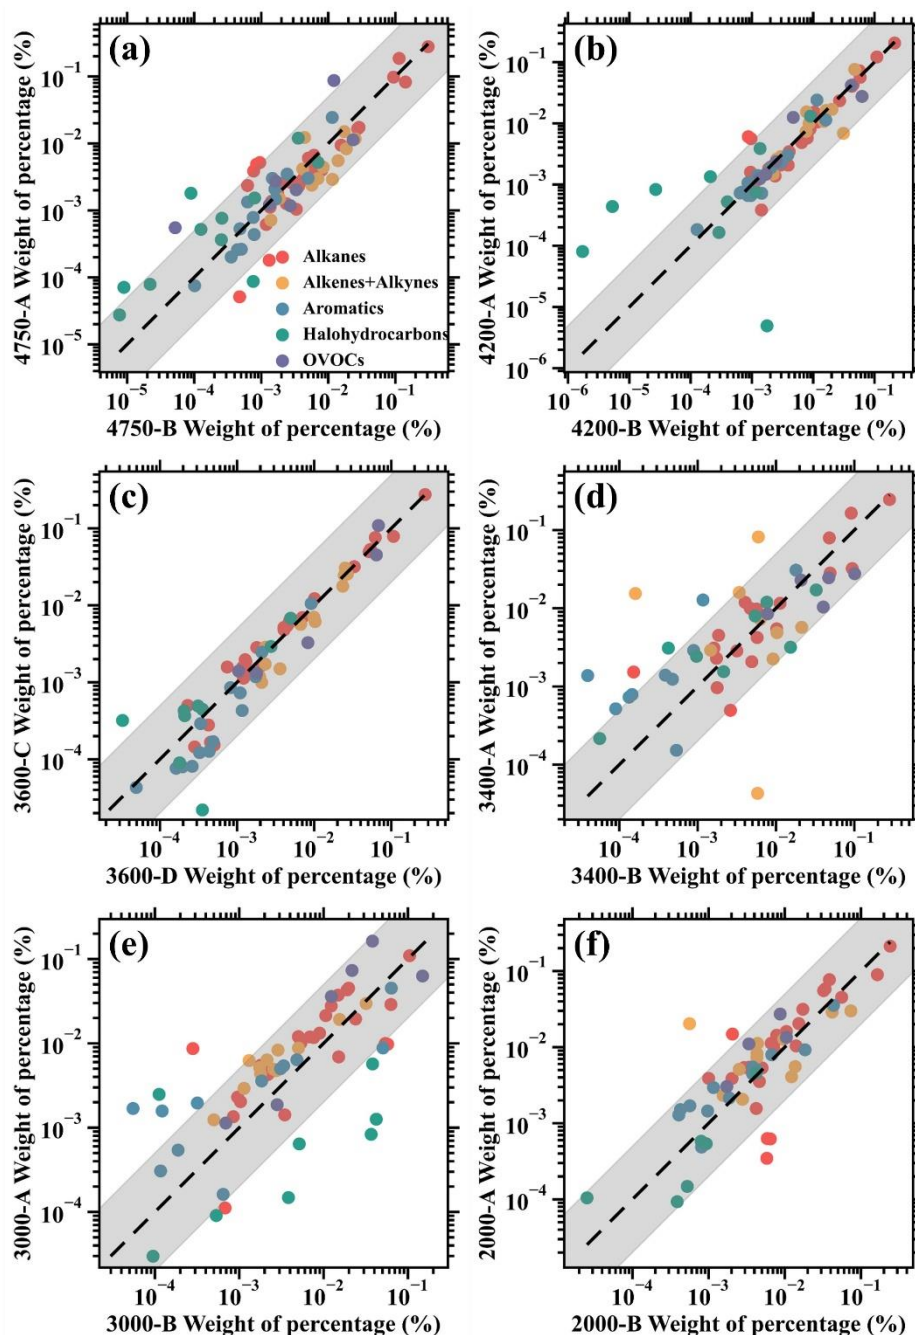

**Figure S5.** Consistency of source profiles across different directions and altitudes in a tunnel. This figure presents the source profile fitting results for samples collected at various altitudes and in different directions in a specific tunnel, (a) through (f) correspond sequentially to the fitted source profiles at each altitude, from 4750 m to 2000 m.

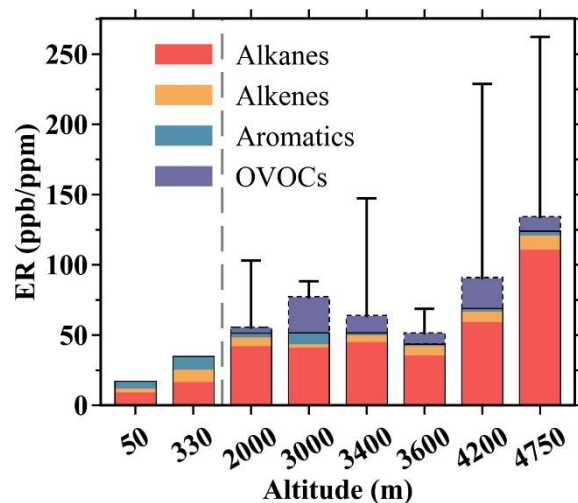

**Figure S6.** Altitudinal trends in different VOC components, stacked plot illustrating variations in ER with altitude. The gray dashed line on the left side represents results from other studies conducted in low-altitude tunnels. Specifically, data at 330 m are from the Chung-Liao tunnel in Taiwan (Chiang et al., 2007), and at 50 m from the Shing Mum tunnel in Hong Kong (Ho et al., 2009).



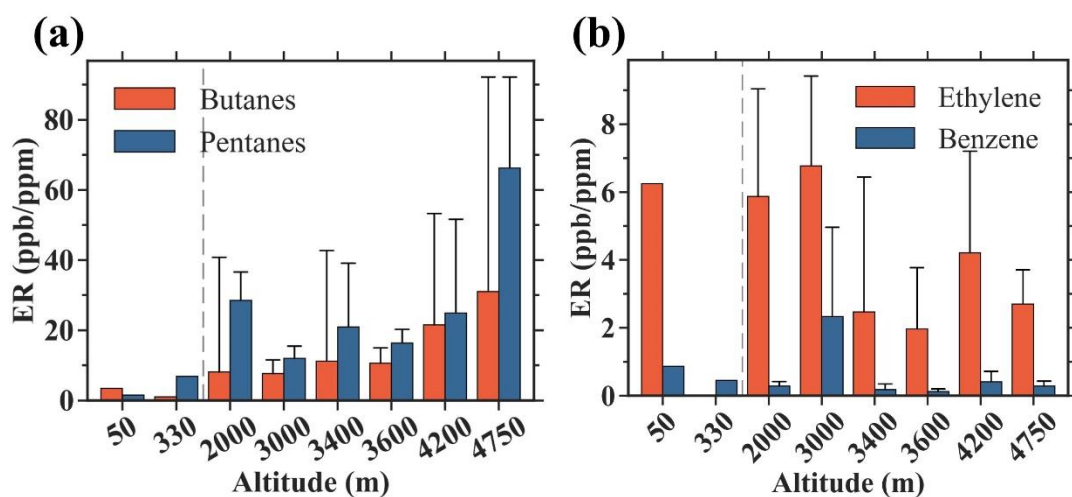

**Figure S7.** Variation trends of ER for representative species with altitude. (a) The trends in ER for butanes and pentanes. (b) The trends in ER for ethylene and benzene. Data at 330 m are from the Chung-Liao tunnel in Taiwan (Chiang et al., 2007), and at 50 m from the Shing Mum tunnel in Hong Kong (Ho et al., 2009).

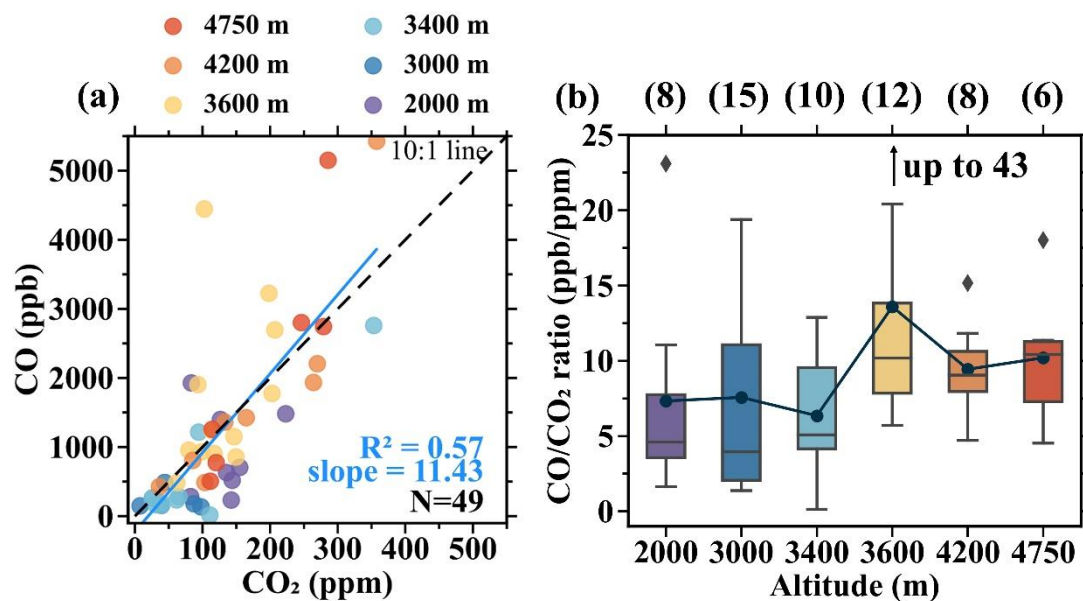

**Figure S8.** Variations in combustion efficiency (CO/CO<sub>2</sub>) from altitudes of 4750 m to 2000 m. (a) The scatter plots depicting the average concentrations of CO versus CO<sub>2</sub> within the tunnel are presented individually. (b) The trend of CO/CO<sub>2</sub> ratios at different altitudes. Different colors denote varying altitudes, with diamond symbols marking outliers beyond 1.5 times the interquartile range and numbers in parentheses representing corresponding sample quantities.

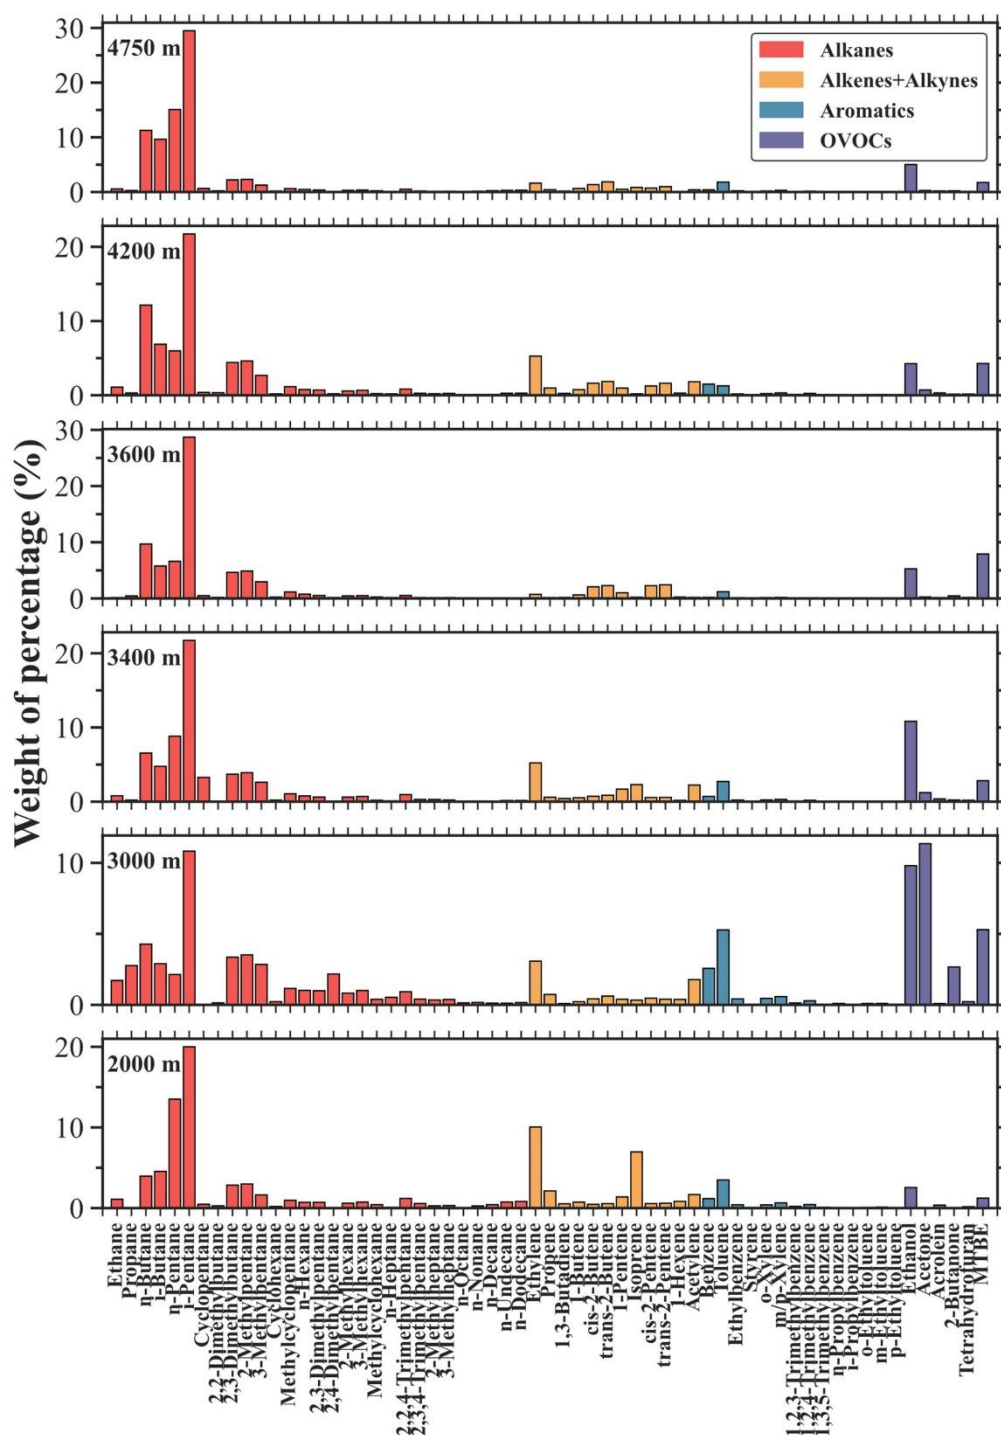

**Figure S9.** The source profiles of tunnels at different altitudes in this study. These profiles depict the relative contribution percentage by mass of various VOC species in the tunnels.

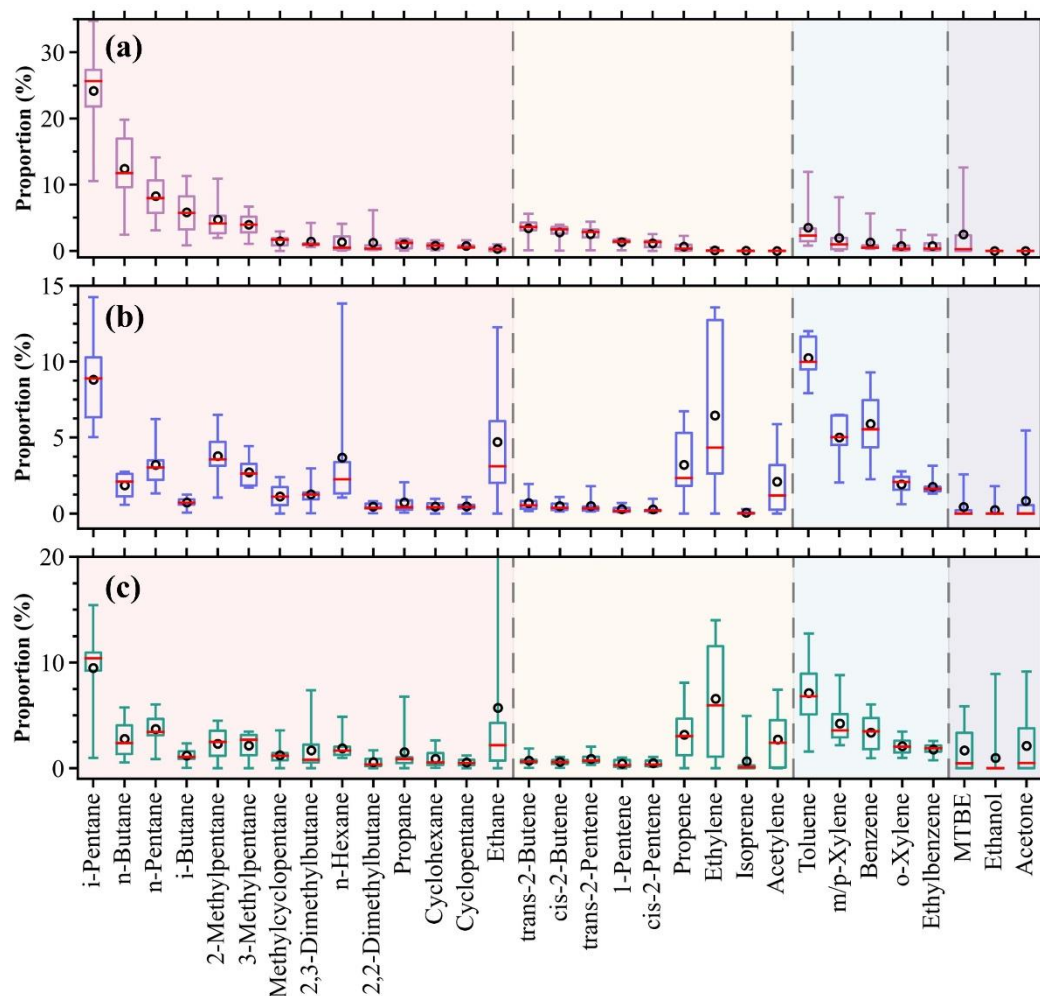

**Figure S10.** Source profiles from previous studies. (a) Gasoline vapors profiles from the SHED test results (Harley et al., 2000; Na et al., 2004; Liu et al., 2008; Zhang et al., 2013; Wu et al., 2015; Man et al., 2020; Sun et al., 2021). (b) Gasoline vehicle exhaust profiles from chassis dynamometer test results (Schauer et al., 2002; Na et al., 2004; Guo et al., 2011; Gao et al., 2012; Ou et al., 2014; Li et al., 2019; Wang et al., 2022). (c) Tunnel profiles from low-altitude tunnel measurements (Staehelin et al., 1998; Hwa et al., 2002; Zhang et al., 2018b; Chiang et al., 2007; Gentner et al., 2013; Zhang et al., 2018a; Sun et al., 2019; Feng et al., 2021; Song et al., 2020; Jin et al., 2021; Song et al., 2018). The background colors of red, yellow, blue, and purple represent alkanes, alkenes, aromatics, and OVOCs, respectively.

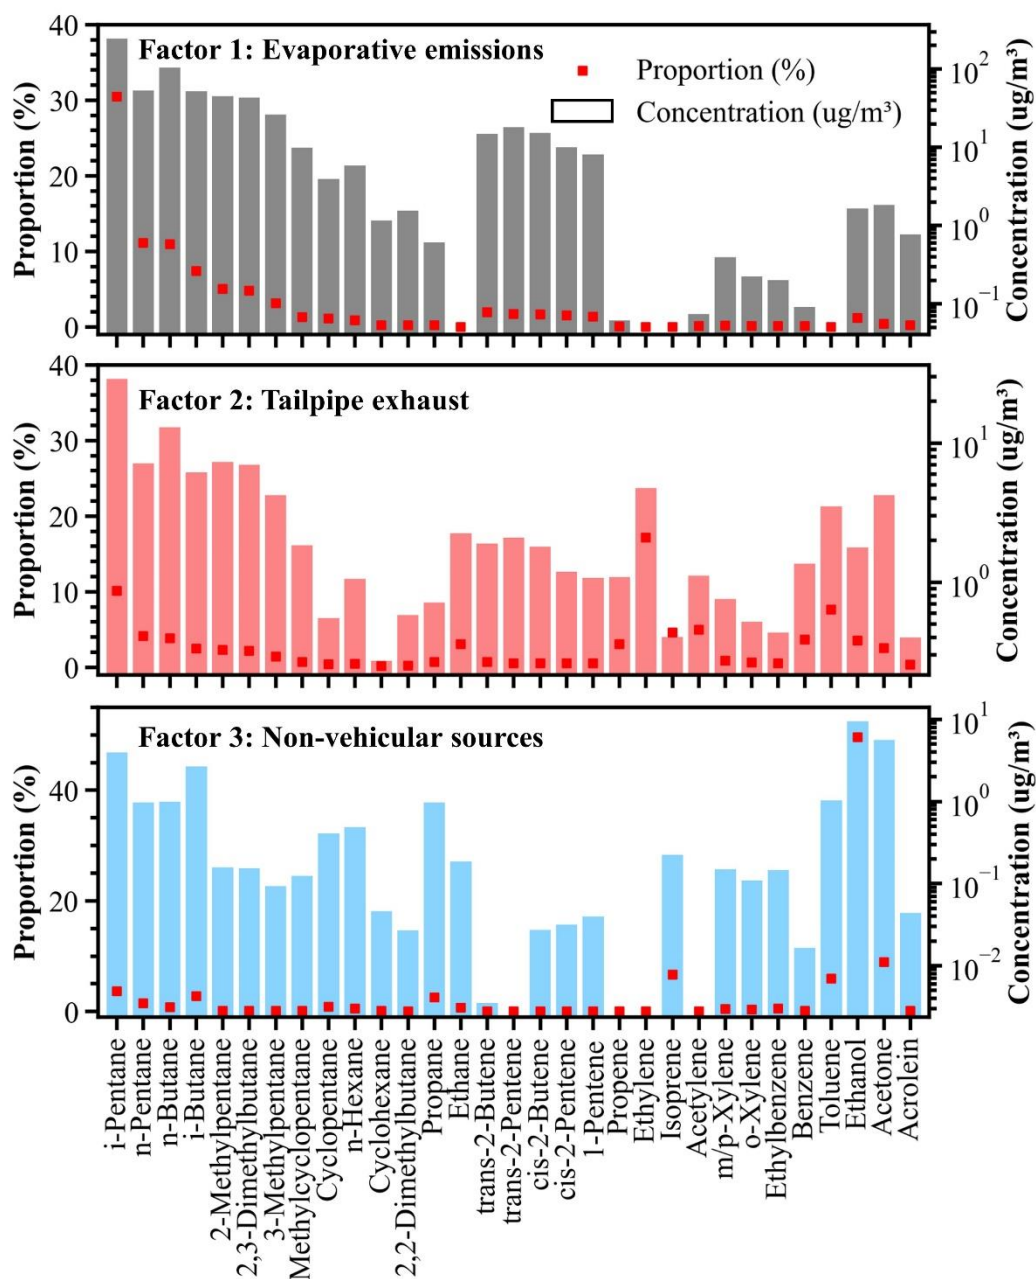

**Figure S11.** PMF source profiles and concentration. The red square dots represent the VOCs contributions from different sources (%), while the bar chart represents the concentration (ug/m<sup>3</sup>).

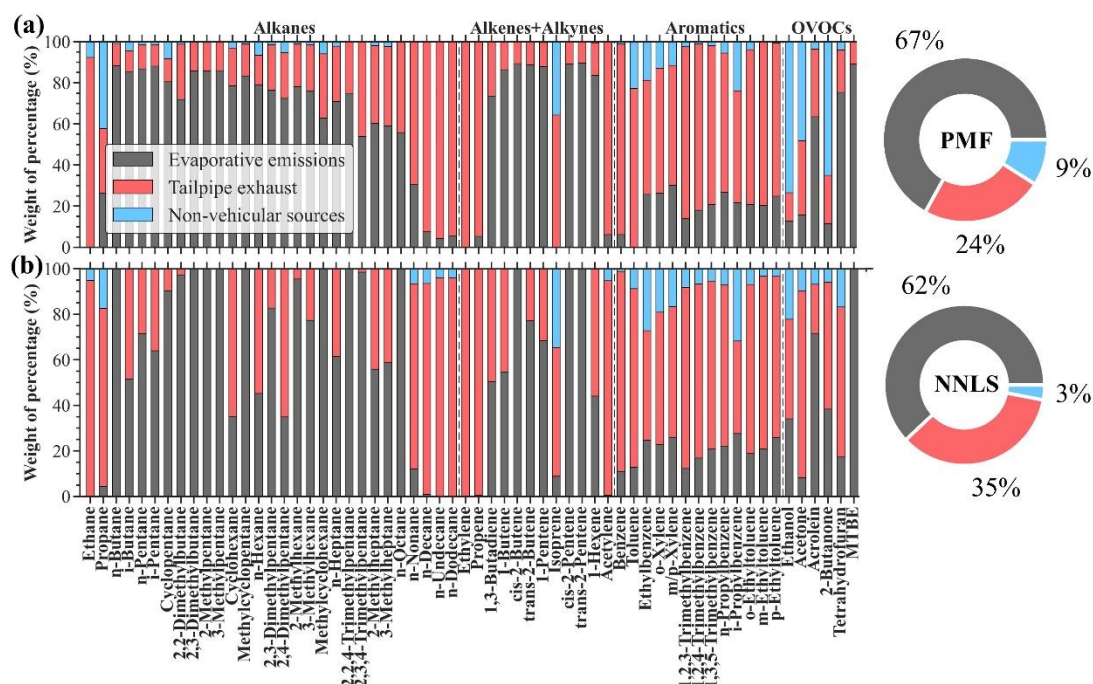

**Figure S12.** Relative contributions of VOC species sources identified in this study. (a) The results from PMF source apportionment, identifying three primary sources of VOCs with their respective contribution percentages: evaporative emissions (67%), tailpipe exhaust (24%), and non-vehicular sources (9%). (b) The results from NNLS analysis, revealing a different distribution of source contributions: evaporative emissions (62%), tailpipe exhaust (35%), and non-vehicular sources (3%).



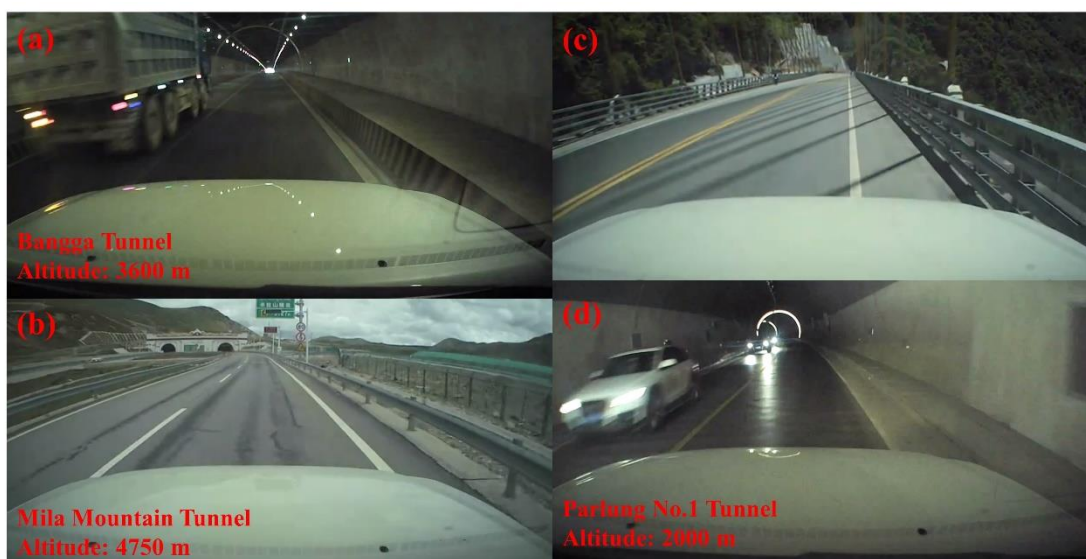

**Figure S13.** Screenshot of the driving recorder at the tunnel. (a) The bangga tunnel at 3600 m was affected by a high-emission event during a canister sampling period due to heavy diesel vehicle traffic, (b) the mila mountain tunnel is located at an altitude of 4750 m, with sparse vegetation near the tunnel entrance, (c) and (d) the parlung No. 1 tunnel is a mountain crossing tunnel surrounded by abundant vegetation, situated at an altitude of 2000 m. Additionally, it operates as a two-way tunnel, allowing traffic to flow in opposite directions.

## Reference

- Royal Society of Chemistry. ChemSpider | Search and share chemistry: <https://www.chemspider.com/>, last access: 2025-2-17.
- Chiang, H. L., Hwu, C. S., Chen, S. Y., Wu, M. C., Ma, S. Y., and Huang, Y. S.: Emission factors and characteristics of criteria pollutants and volatile organic compounds (VOCs) in a freeway tunnel study, *Sci. Total. Environ.*, 381, 200-211, <https://doi.org/10.1016/j.scitotenv.2007.03.039>, 2007.
- Du, Z. F., Hu, M., Peng, J. F., Zhang, W. B., Zheng, J., Gu, F. T., Qin, Y. H., Yang, Y. D., Li, M. R., Wu, Y. S., Shao, M., and Shuai, S. J.: Comparison of primary aerosol emission and secondary aerosol formation from gasoline direct injection and port fuel injection vehicles, *Atmos. Chem. Phys.*, 18, 9011-9023, <https://doi.org/10.5194/acp-18-9011-2018>, 2018.
- Feng, M., Hu, X., Zhou, L., Zhang, T. Y., Zhang, X., Tan, Q. N., Zhou, Z. H., Deng, Y., Song, D. L., and Huang, C. M.: Real-World Vehicle Volatile Organic Compound Emissions and Their Source Profile in Chengdu Based on a Roadside and Tunnel Study, *Atmosphere*, 12, 13, <https://doi.org/10.3390/atmos12070861>, 2021.
- Gao, S., Jin, L., Shi, J., Han, B., Wang, X., Peng, Y., Zhao, L., and Bai, Z.: VOCs emission characteristics and emission factors of light-duty gasoline vehicles with bench test (in Chinese), *China-Environ. Sci.*, 32, 397-405, 2012.
- Gentner, D. R., Worton, D. R., Isaacman, G., Davis, L. C., Dallmann, T. R., Wood, E. C., Herndon, S. C., Goldstein, A. H., and Harley, R. A.: Chemical Composition of Gas-Phase Organic Carbon Emissions from Motor Vehicles and Implications for Ozone Production, *Environ. Sci. Technol.*, 47, 11837-11848, <https://doi.org/10.1021/es401470e>, 2013.
- Guo, H., Zou, S. C., Tsai, W. Y., Chan, L. Y., and Blake, D. R.: Emission characteristics of nonmethane hydrocarbons from private cars and taxis at different driving speeds in Hong Kong, *Atmos. Environ.*, 45, 2711-2721, <https://doi.org/10.1016/j.atmosenv.2011.02.053>, 2011.



297 Harley, R. A., Coulter-Burke, S. C., and Yeung, T. S.: Relating liquid fuel and headspace  
 298 vapor composition for California reformulated gasoline samples containing ethanol,  
 299 Environ. Sci. Technol., 34, 4088-4094, <https://doi.org/10.1021/es0009875>, 2000.  
 300 Ho, K. F., Lee, S. C., Ho, W. K., Blake, D. R., Cheng, Y., Li, Y. S., Ho, S. S. H., Fung,  
 301 K., Louie, P. K. K., and Park, D.: Vehicular emission of volatile organic compounds  
 302 (VOCs) from a tunnel study in Hong Kong, Atmos. Chem. Phys., 9, 7491-7504,  
 303 <https://doi.org/10.5194/acp-9-7491-2009>, 2009.  
 304 Hwa, M. Y., Hsieh, C. C., Wu, T. C., and Chang, L. F. W.: Real-world vehicle emissions  
 305 and VOCs profile in the Taipei tunnel located at Taiwan Taipei area, Atmos. Environ.,  
 306 36, 1993-2002, [https://doi.org/10.1016/s1352-2310\(02\)00148-6](https://doi.org/10.1016/s1352-2310(02)00148-6), 2002.  
 307 Jin, B. Q., Zhu, R. C., Mei, H., Wang, M. L., Zu, L., Yu, S. J., Zhang, R. Q., Li, S. Y.,  
 308 and Bao, X. F.: Volatile organic compounds from a mixed fleet with numerous E10-  
 309 fuelled vehicles in a tunnel study in China: Emission characteristics, ozone formation  
 310 and secondary organic aerosol formation, Environ. Res., 200, 10,  
 311 <https://doi.org/10.1016/j.envres.2021.111463>, 2021.  
 312 Li, W., Sha, Q. e., Yuan, Z., Wang, R., Lin, X., Zheng, J., and Shao, M.: Emission  
 313 characteristics of VOCs from light-duty gasoline vehicles at constant speed in the Pearl  
 314 River Delta (in Chinese), Acta. Sci. Circumst., 39, 243-251,  
 315 <https://doi.org/10.13671/j.hjkxxb.2018.0340>, 2019.  
 316 Liu, Y., Shao, M., Fu, L. L., Lu, S. H., Zeng, L. M., and Tang, D. G.: Source profiles of  
 317 volatile organic compounds (VOCs) measured in China: Part I, Atmos. Environ., 42,  
 318 6247-6260, <https://doi.org/10.1016/j.atmosenv.2008.01.070>, 2008.  
 319 Man, H. Y., Liu, H., Niu, H., Wang, K., Deng, F. Y., Wang, X. T., Xiao, Q., and Hao, J.  
 320 M.: VOCs evaporative emissions from vehicles in China: Species characteristics of  
 321 different emission processes, Env. Sci. Ecotechnol., 1, 11,  
 322 <https://doi.org/10.1016/j.esec.2019.100002>, 2020.  
 323 Na, K., Kim, Y. P., Moon, I., and Moon, K. C.: Chemical composition of major VOC  
 324 emission sources in the Seoul atmosphere, Chemosphere, 55, 585-594,  
 325 <https://doi.org/10.1016/j.chemosphere.2004.01.010>, 2004.

326 Ou, J., Feng, X., Liu, Y., Gao, Z., Yang, Y., Zhang, Z., Wang, X., and Zheng, J.: Source  
 327 characteristics of VOCs emissions from vehicular exhaust in the Pearl River Delta  
 328 region (in Chinese), *Acta. Sci. Circumst.*, 34, 826-834,  
 329 <https://doi.org/10.13671/j.hjkxxb.2014.0614>, 2014.  
 330 Paatero, P. and Tapper, U.: Positive matrix factorization: A non - negative factor model  
 331 with optimal utilization of error estimates of data values, *Environmetrics*, 5, 111-126,  
 332 <https://doi.org/10.1002/env.3170050203>, 1994.  
 333 Schauer, J. J., Kleeman, M. J., Cass, G. R., and Simoneit, B. R. T.: Measurement of  
 334 emissions from air pollution sources. 5. C<sub>1</sub>-C<sub>32</sub> organic compounds from gasoline-  
 335 powered motor vehicles, *Environ. Sci. Technol.*, 36, 1169-1180,  
 336 <https://doi.org/10.1021/es0108077>, 2002.  
 337 Song, C., Ma, C., Zhang, Y., Wang, T., Wu, L., Wang, P., Liu, Y., Li, Q., Zhang, J., and  
 338 Dai, Q.: Heavy-duty diesel vehicles dominate vehicle emissions in a tunnel study in  
 339 northern China, *Sci. Total. Environ.*, 637, 431-442,  
 340 <https://doi.org/10.1016/j.scitotenv.2018.04.387>, 2018.  
 341 Song, C. B., Liu, Y., Sun, L. N., Zhang, Q. J., and Mao, H. J.: Emissions of volatile  
 342 organic compounds (VOCs) from gasoline- and liquified natural gas (LNG)-fueled  
 343 vehicles in tunnel studies, *Atmos. Environ.*, 234, 13,  
 344 <https://doi.org/10.1016/j.atmosenv.2020.117626>, 2020.  
 345 Staehelin, J., Keller, C., Stahel, W., Schl  pfer, K., and Wunderli, S.: Emission factors  
 346 from road traffic from a tunnel study (Gubrist tunnel, Switzerland). Part III: Results of  
 347 organic compounds, SO<sub>2</sub> and speciation of organic exhaust emission, *Atmos. Environ.*,  
 348 32, 999-1009, [https://doi.org/10.1016/S1352-2310\(97\)00339-7](https://doi.org/10.1016/S1352-2310(97)00339-7), 1998.  
 349 Sun, L., Liu, Y., Zhao, J., Sun, S., Song, C., Zhang, J., Li, Y., Lin, Y., Wang, T., and  
 350 Mao, H.: Pollution Characteristics and Emission Factors of VOCs from Vehicle  
 351 Emissions in the Tianjin Tunnel (in Chinese), *Environ. Sci-China*, 40, 104-113,  
 352 <https://doi.org/10.13227/j.hjkx.201804187>, 2019.  
 353 Sun, L. N., Zhong, C. Z., Peng, J. F., Wang, T., Wu, L., Liu, Y., Sun, S. D., Li, Y. N.,  
 354 Chen, Q., Song, P. F., and Mao, H. J.: Refueling emission of volatile organic compounds

from China 6 gasoline vehicles, *Sci. Total. Environ.*, 789, 10,  
<https://doi.org/10.1016/j.scitotenv.2021.147883>, 2021.

Wang, S., Yuan, B., Wu, C., Wang, C., Li, T., He, X., Huangfu, Y., Qi, J., Li, X.-B., and  
 Sha, Q. e.: Oxygenated volatile organic compounds (VOCs) as significant but varied  
 contributors to VOC emissions from vehicles, *Atmos. Chem. Phys.*, 22, 9703-9720,  
<https://doi.org/10.5194/acp-22-9703-2022>, 2022.

Wu, Y., Yang, Y. D., Shao, M., and Lu, S. H.: Missing in total OH reactivity of VOCs  
 from gasoline evaporation, *Chin. Chem. Lett.*, 26, 1246-1248,  
<https://doi.org/10.1016/j.cclet.2015.05.047>, 2015.

Zhang, Q. J., Wu, L., Fang, X. Z., Liu, M. Y., Zhang, J., Shao, M., Lu, S. H., and Mao,  
 H. J.: Emission factors of volatile organic compounds (VOCs) based on the detailed  
 vehicle classification in a tunnel study, *Sci. Total. Environ.*, 624, 878-886,  
<https://doi.org/10.1016/j.scitotenv.2017.12.171>, 2018a.

Zhang, Y. L., Wang, X. M., Zhang, Z., Lü, S. J., Shao, M., Lee, F. S. C., and Yu, J. Z.:  
 Species profiles and normalized reactivity of volatile organic compounds from gasoline  
 evaporation in China, *Atmos. Environ.*, 79, 110-118,  
<https://doi.org/10.1016/j.atmosenv.2013.06.029>, 2013.

Zhang, Y. L., Yang, W. Q., Simpson, I., Huang, X. Y., Yu, J. Z., Huang, Z. H., Wang, Z.  
 Y., Zhang, Z., Liu, D., Huang, Z. Z., Wang, Y. J., Pei, C. L., Shao, M., Blake, D. R.,  
 Zheng, J. Y., Huang, Z. J., and Wang, X. M.: Decadal changes in emissions of volatile  
 organic compounds (VOCs) from on-road vehicles with intensified automobile  
 pollution control: Case study in a busy urban tunnel in south China, *Environ. Pollut.*,  
 233, 806-819, <https://doi.org/10.1016/j.envpol.2017.10.133>, 2018b.
